# Supplementary material
Source: HighWire-hosted journal article supplement (http://www.annfammed.org/highwire/filestream/8519/field_highwire_adjunct_files/11/Goldman_Supp_App_7.pdf)
Supplement: Goldman_Supp_App_7.pdf [file Goldman_Supp_App_7.pdf]

**Goldman R, Parker DR, Brown J, Walker J, Eaton CB, Borkan JM. Recommendations for a Mixed Methods Approach for Evaluating the Patient-Centered Medical Home. *Ann Fam Med.* 2015;13(2):.**

**Supplemental Appendix 7. Brown Staff Pathway Observation Grid**

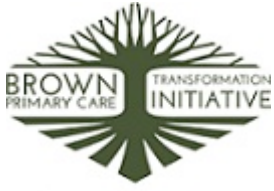

# Brown Primary Care Transformation Initiative

## Staff Path Observation Grid

Staff Study ID Number: \_\_\_\_\_

Site: \_\_\_\_\_

Staff Role: \_\_\_\_\_

Date: \_\_\_\_\_

Observer's name: \_\_\_\_\_

Start time: \_\_\_\_\_ End time: \_\_\_\_\_

| Time | Observed Action/Task/Interaction | Thoughts and Insights (e.g. team based care, efficiency, redundancy, conflicts, communication styles, attitudes/tone, etc.) |
|------|----------------------------------|-----------------------------------------------------------------------------------------------------------------------------|
|      |                                  |                                                                                                                             |
|      |                                  |                                                                                                                             |
|      |                                  |                                                                                                                             |
|      |                                  |                                                                                                                             |
|      |                                  |                                                                                                                             |
|      |                                  |                                                                                                                             |
|      |                                  |                                                                                                                             |
|      |                                  |                                                                                                                             |
|      |                                  |                                                                                                                             |

1. Do you think you said or did anything differently because I was with you today? \_\_\_\_\_
  - a. [If yes] How so?
  
2. Do you think you said or did anything differently because of anything we discussed today? \_\_\_\_\_
  - a. [If yes] How so?
